# Supplementary material for: Clinical Validation of a Colorimetric Loop-Mediated Isothermal Amplification Using a Portable Device for the Rapid Detection of SARS-CoV-2
Source: MDPI journal article supplement (doi:10.3390/diagnostics13071355), 2023-04-06
Supplement: s1 [file s1]

## Supplementary information

**Table S1.** Sequences of gene E and N of SARS-CoV-2 used as positive controls.

| Gene E target sequence         | Gene N target sequence      |
|--------------------------------|-----------------------------|
| TGAGTACGAACTTATGTACTCATTCGTTT  | ACCAGGAACTAATCAGACAAGGAACT  |
| CGGAAGAGACAGGTACGTTAATAGTTAA   | GATTACAAACATTGGCCGCAAATTGC  |
| TAGCGTACTTCTTTTTCTTGCTTTCGTGGT | ACAATTTGCCCCCAGCGCTTCAGCGTT |
| ATTCTTGCTAGTTACACTAGCCATCCTTA  | CTTCGGAATGTCGCGCATTGGCATGGA |
| CTGCGCTTCGATTGTGTGCGTACTGCTGC  | AGTCACACCTTCGGGAACGTGGTTGAC |
| AATATTGTTAACGTGAGTCTTGTAACC    | CTACACAGGTGCCATCAAATTGGATG  |
| TTCTTTTACGTTTACTCTCGTGTTAAAAA  | ACAAAGATCCAAATTTCAAAGATCAA  |
| TCTGAA                         | GTC                         |

**Table S2.** LAMP primer sequences.

| Gene E | Sequence                                    |
|--------|---------------------------------------------|
| E1-F3  | TGAGTACGAACTTATGTACTCAT                     |
| E1-B3  | TTCAGATTTTAAACACGAGAGT                      |
| E1-FIP | ACCACGAAAGCAAGAAAAAGAAGTTCGTTTCGGAAGAGACAG  |
| E1-BIP | TTGCTAGTTACACTAGCCATCCTTAGGTTTACAAGACTCACGT |
| E1-LF  | CGCTATTAACATTAACG                           |
| E1-LB  | GCGCTTCGATTGTGTGCGT                         |
| Gene N | Sequence                                    |
| N2-F3  | ACCAGGAACTAATCAGACAAG                       |
| N2-B3  | GACTTGATCTTTGAAATTTGGATCT                   |
| N2-FIP | TTCCGAAGAACGCTGAAGCGGAACTGATTACAAACATTGGCC  |

|                  |                                          |
|------------------|------------------------------------------|
| N2-BIP           | CGCATTGGCATGGAAGTCACAATTTGATGGCACCTGTGTA |
| N2-LF            | GGGGGCAAATTGTGCAATTTG                    |
| N2-LB            | CTTCGGGAACGTGGTTGACC                     |
| <b>Hs_rActin</b> | <b>Sequence</b>                          |
| ACT-F3           | AGTACCCCATCGAGCACG                       |
| ACT-B3           | AGCCTGGATAGCAACGTACA                     |
| ACT-FIP          | GAGCCACACGCAGCTCATTGTATCACCAACTGGGACGACA |
| ACT-BIP          | CTGAACCCCAAGGCCAACCGGCTGGGGTGTGAAGGTC    |
| ACT-LF           | TGTGGTGCCAGATTTTCTCCA                    |
| ACT-LB           | CGAGAAGATGACCCAGATCATGT                  |

**Table S3.** Reproducibility data. The reproducibility test was performed with a serial dilution of each positive control (pUC17\_N and pUC17\_E) at a final concentration of  $10^3$  (level 1),  $10^4$  (level 2) and  $10^5$  (level 3) copies per  $\mu\text{L}$ , each.

| Run data                  |                  | Level 1 - $10^3$ | Level 2 - $10^4$ | Level 3 - $10^5$ |
|---------------------------|------------------|------------------|------------------|------------------|
| Operator and date         | Positive results | Replicates       | Replicates       | Replicates       |
| Operator 1 - Dec 10, 2020 | 100%             | 10/10            | 10/10            | 10/10            |
| Operator 2 - Dec 11, 2020 |                  |                  |                  |                  |
| Operator 3 - Dec 14, 2020 |                  |                  |                  |                  |
| Operator 1 - Dec 10, 2020 | 100%             | 10/10            | 10/10            | 10/10            |
| Operator 2 - Dec 11, 2020 |                  |                  |                  |                  |
| Operator 3 - Dec 14, 2020 |                  |                  |                  |                  |

|                           |      |       |       |       |  |
|---------------------------|------|-------|-------|-------|--|
| Operator 1 - Dec 10, 2020 |      |       |       |       |  |
| Operator 2 - Dec 11, 2020 | 100% | 10/10 | 10/10 | 10/10 |  |
| Operator 3 - Dec 14, 2020 |      |       |       |       |  |

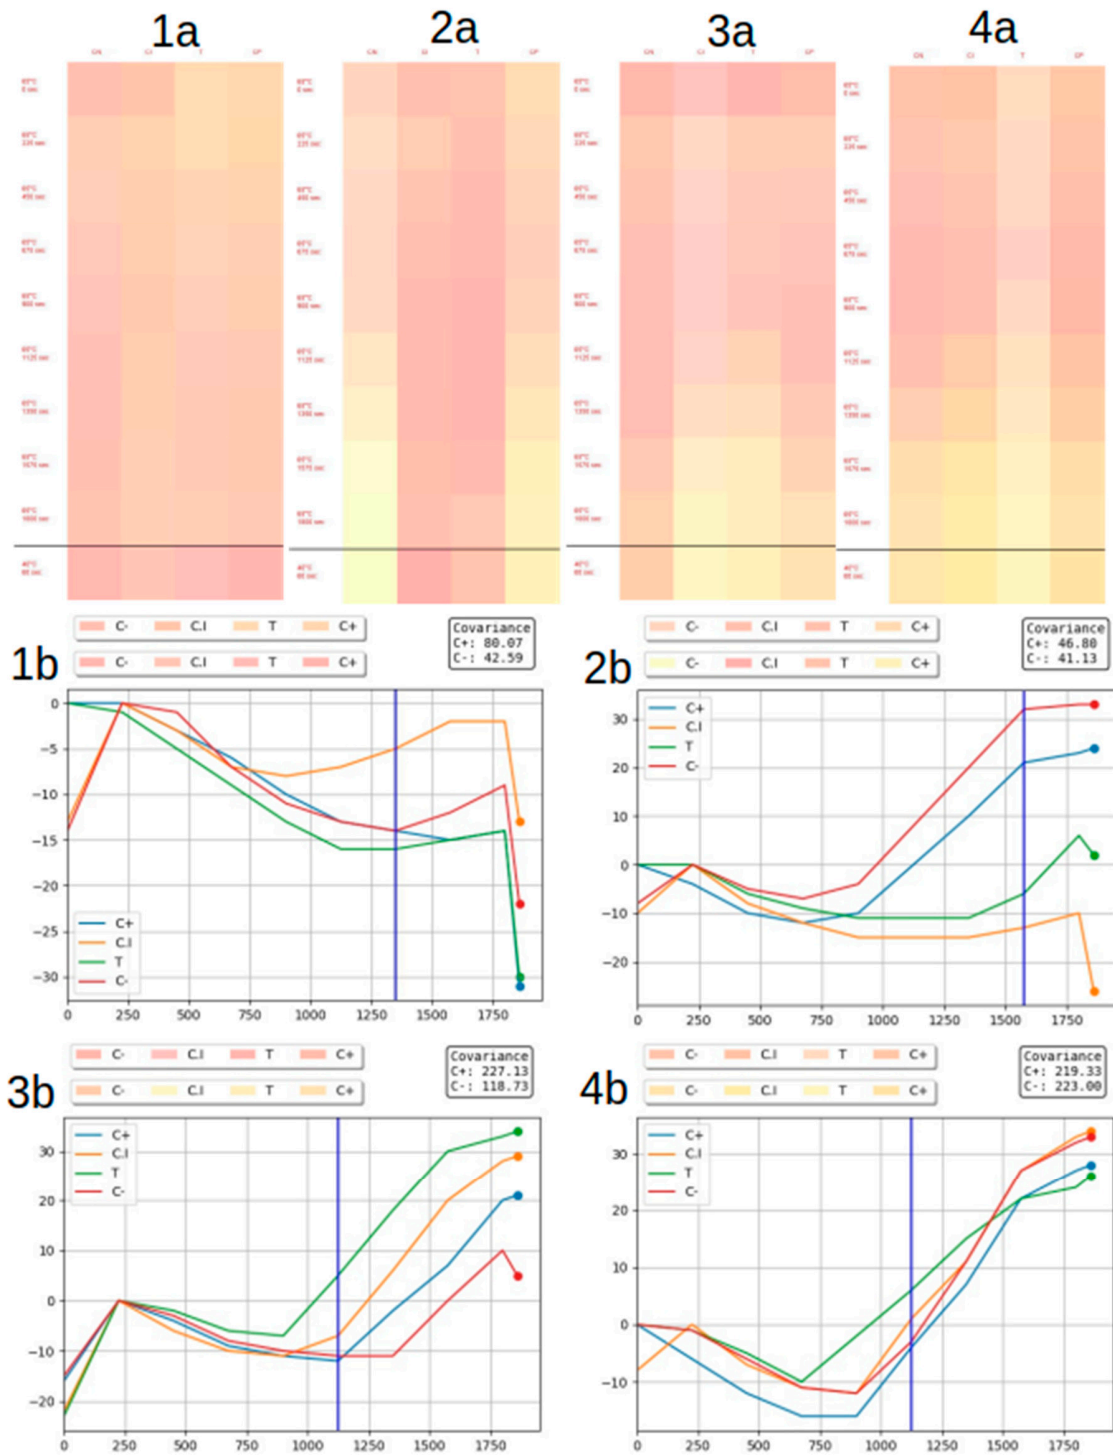

**Figure S1.** Software images obtained from the Limit of Detection (LoD) test. Figure 1a-b represents the non-template control. Figure 2a-b represents the  $2.44 \times 10^2$  and  $1.22 \times 10^2$  (left to right) genomic copies per reaction. Figure 3a-b represents the  $9.77 \times 10^2$  and  $4.88 \times 10^2$  (left to right) genomic copies per reaction. Figure 4a-b represents the  $1.95 \times 10^3$  genomic copies per reaction.

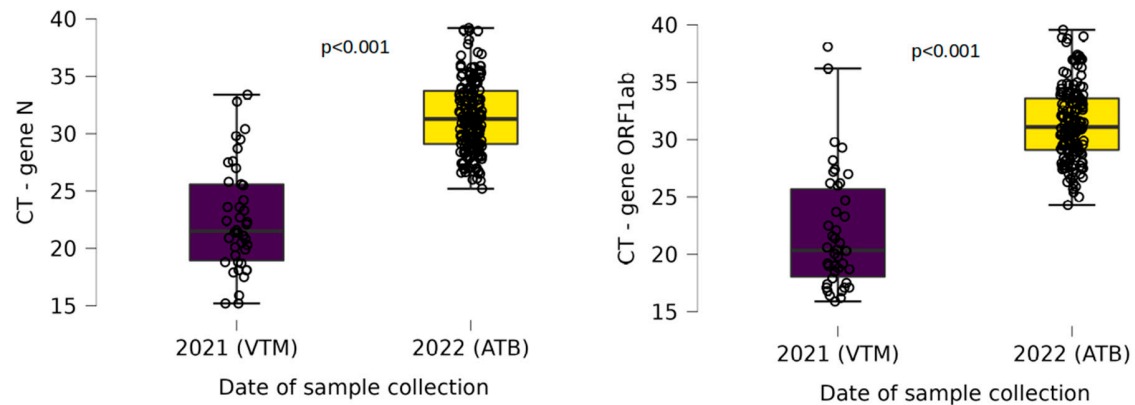

**Figure S2.** RT-qPCR CTs for samples collected in viral transport media (VTM) or antigen-test buffer (ATB). CTs for the N gene are shown in the left image, and the ORF1ab gene is in the right image. For both genes, we saw a statistically significant difference between sample solutions ( $p < 0.001$ ).

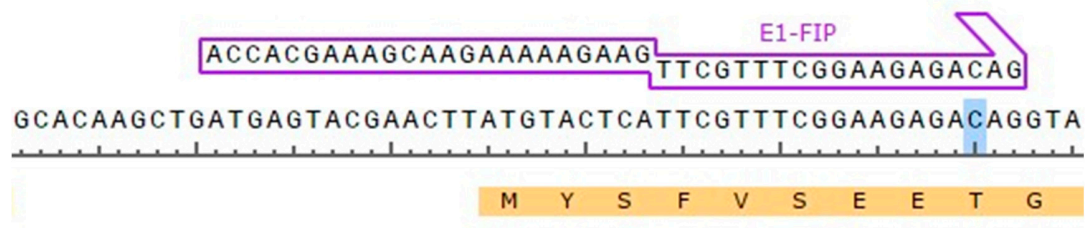

**Figure S3.** Omicron variant mutation at E gene (T9I). In purple is the sequence of our FIP primer targeting the E gene, demonstrating that the mutation of the Omicron variant affected the primer annealing.
